# Supplementary material for: Adipocyte Spliced Form of X-Box–Binding Protein 1 Promotes Adiponectin Multimerization and Systemic Glucose Homeostasis
Source: PubMed Central journal article supplement — Diabetes. 2014 Feb 13;63(3):867–79. doi: 10.2337/db13-1067 (PMC3931404; doi:10.2337/db13-1067), 2014-02-13

SUPPLEMENTARY DATA

**Supplementary Table 1.** Antibodies Used for Western blots.

| Name                    | Source (catalog number)       | Dilution |
|-------------------------|-------------------------------|----------|
| XBP1                    | Santa Cruz (sc-7160)          | 1:1,000  |
| IRE1 $\alpha$           | Cell Signaling (3294)         | 1:1,000  |
| CREB                    | Dr. Marc Montminy (Salk)      | 1:10,000 |
| Adiponectin             | Sigma (A6354)                 | 1:10,000 |
| GRP78                   | Santa Cruz (sc-1051)          | 1:1,000  |
| PDI                     | Assay Design (SPA-890)        | 1:5,000  |
| DsbA-L                  | PhosphoSolutions (465-DsbA-L) | 1:10,000 |
| ERp44                   | Cell signaling (2886)         | 1:1,000  |
| HSP90                   | Santa Cruz (sc-7947)          | 1:10,000 |
| p-Ser473 AKT            | Cell Signaling (9271)         | 1:2,000  |
| AKT                     | Cell Signaling (9272)         | 1:5,000  |
| Goat anti-mouse IgG HRP | BioRad (170-6516)             | 1:10,000 |

SUPPLEMENTARY DATA

**Supplementary Table 2.** Primer Sequences Used for RT-PCR, qPCR and ChIP.

|               | <b>Gene</b>     | <b>Forward</b>         | <b>Reverse</b>         |
|---------------|-----------------|------------------------|------------------------|
| <b>RT-PCR</b> | <i>HA-Xbp1s</i> | ATTACGCCATGGAATTCTGC   | GGACCGGGTACCATGAGC     |
|               | <i>L32</i>      | GAGCAACAAGAAAACCAAGCA  | TGCACACAAGCCATCTACTCA  |
| <b>qPCR</b>   | <i>Xbp1</i>     | ACATCTTCCCATGGACTCTG   | TAGGTCCTTCTGGGTAGACC   |
|               | <i>Xbp1s</i>    | GAGTCCGCAGCAGGTG       | TCCAGAATGCCCAAAGG      |
|               | <i>Xbp1u</i>    | GAAGAGAACCACAACTCCAGC  | GCAGAGGTGCACATAGTCTGAG |
|               | <i>Tnfa</i>     | TCAGCCGATTTGCTATCTCATA | AGTACTTGGGCAGATTGACCTC |
|               | <i>Grp78</i>    | TGTGGTACCCACCAAGAAGTC  | TTCAGCTGTCACTCGGAGAAT  |
|               | <i>Pdia6</i>    | TGGTTCCTTTCCTACCATCACT | ACTTTCCTGCTGGAAAAGTGC  |
|               | <i>DsbA-L</i>   | GCCCATGTGGATGGTAAAAC   | GAAGTAAAGGCAGGCACAGC   |
|               | <i>Erp44</i>    | AGAATTCCATCACGGACCTG   | ACGTAAGCCTCTGCTGGTGT   |
|               | <i>Ero1l</i>    | CGGACCAAGTTATGAGTTCCA  | TCAGAGAGATTCTGCCCTTCA  |
|               | <i>Chop</i>     | ATATCTCATCCCCAGGAAACG  | TCTTCCTTGCTCTTCCTCCTC  |
|               | <i>Adipoq</i>   | GGAACTTGTGCAGGTTGGAT   | GCTTCTCCAGGCTCTCCTTT   |
|               | <i>aP2</i>      | AGCATCATAACCCTAGATGG   | TCACGCCTTTCATAACACAT   |
| <b>ChIP</b>   | <i>Grp78</i>    | ATTGGTGGCCGTTAAGAATG   | TGAAGTCGCTACTCGTTGGA   |
|               | <i>Pdia6</i>    | GGTCCACGTTTGCCTTACTC   | TCCTCCTCCTCACATGAACC   |
|               | <i>Erp44</i>    | CACAGGGCTTACTGGGAAAG   | CCTCTCACGCCCTCACTTC    |
|               | 3'UTR           | GAGCTGGAGCAAGAGTCCAC   | TGGGAATGCAGAATTTAAGG   |

SUPPLEMENTARY DATA

**Supplementary Figure 1.** Gene expression and glucose tolerance test in moderate adipocyte XBP1s transgenic mice. *A*: qPCR analysis of XBP1s target gene *Erdj4*, *P58ipk* and *Edem*, and non-target gene *Chop* in WAT of WT (n = 6) and TGm mice (n = 3). *B*: Body weights of 37-week-old WT (n = 7) and TGm (n = 5) male mice. *C*: Glucose tolerance test. Blood glucose concentrations of mice in (*B*) were measured at indicated time points post i.p. 2 g glucose/kg body weight. Right, area under the curve (AUC) analysis. Data are mean  $\pm$  s.e.m. N.S., not significant by Student's *t* test.

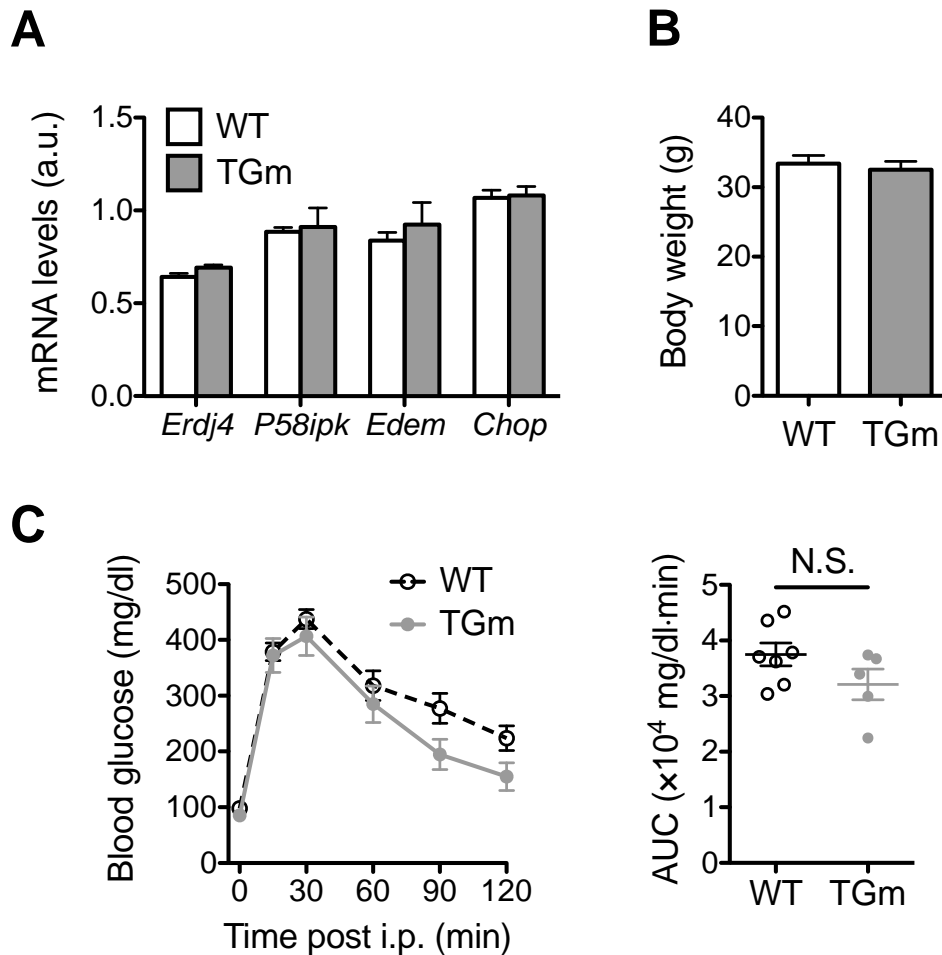

SUPPLEMENTARY DATA

**Supplementary Figure 2.** Overexpression of XBP1s promotes adiponectin multimerization in 3T3-L1 adipocytes. Fully differentiated 3T3-L1 adipocytes were transfected with GFP (CON) or XBP1s plasmids by electroporation. 24 h later, cells and medium were collected for further analyses. **A:** Representative Western blot analysis of adiponectin complexes secreted by 3T3-L1 adipocytes following sucrose gradient fractionation. Right: quantitation of the ratio of HMW to LMW adiponectin from three independent experiments. **B:** Q-PCR analysis of *aP2* expression, normalized to ribosomal gene *L32*. **C:** Q-PCR analysis in 3T3-L1 adipocytes transfected with GFP (CON) or XBP1s. Gene expression was normalized to ribosomal gene *L32*. Data are mean  $\pm$  s.e.m. \* $p < 0.05$  by Student's *t* test. a.u., arbitrary unit. **D:** Western blot analysis in 3T3-L1 adipocytes transfected with GFP (CON) or XBP1s

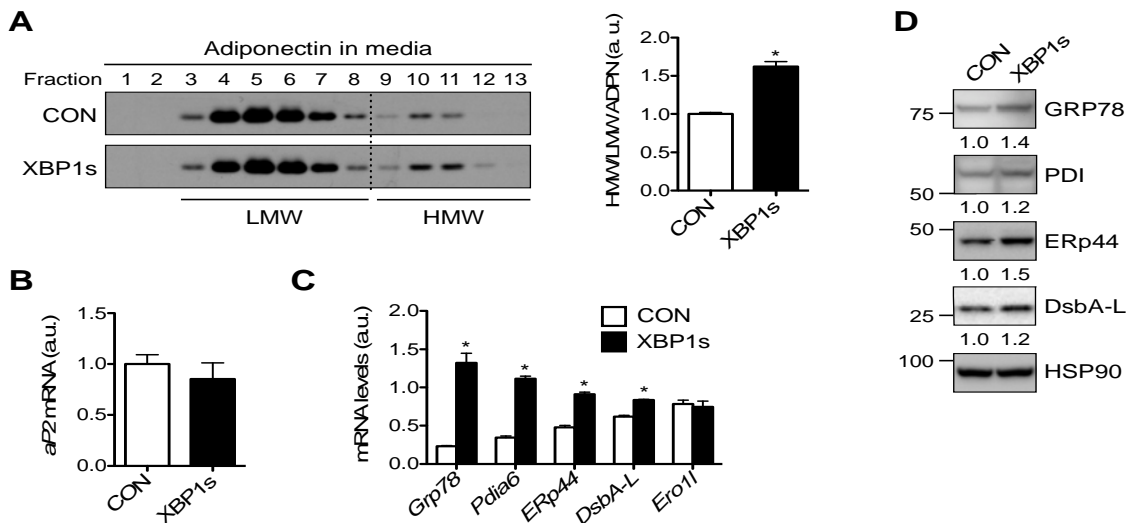

**Supplementary Figure 3.** Knockdown of *DsbA-L* attenuates the effect of XBP1s on adiponectin multimerization in 3T3-L1 adipocytes. 3T3-L1 adipocytes at day 7 were transfected with XBP1s or XBP1s together with *DsbA-L* RNAi (*DsbA-Li*) plasmids by electroporation. 48 h later, cells and medium were collected for further analyses. **A:** *DsbA-L* mRNA levels determined by qPCR. Bars represent mean  $\pm$  s.e.m. \* $p < 0.05$  by Student's *t* test. **B:** Western blot analysis of adiponectin complexes secreted by 3T3-L1 adipocytes following sucrose gradient fractionation. Quantitation of HMW/LMW adiponectin shown on the right of the blots.

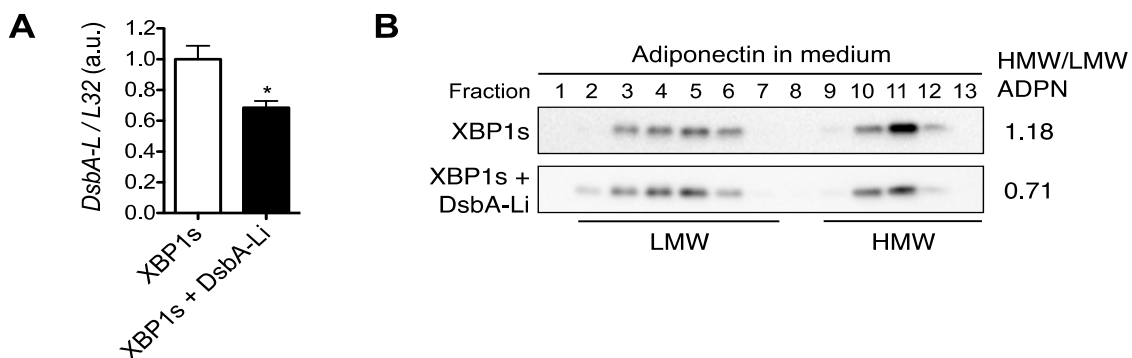

SUPPLEMENTARY DATA

**Supplementary Figure 4.** Transient knockdown of *Xbp1* has no effect on adiponectin multimerization in 3T3-L1 adipocytes. 3T3-L1 adipocytes at day 7 were transfected with control RNAi (CONi) or XBP1 RNAi (XBP1i) plasmids for 24 h by electroporation; cells and medium were collected for further analyses. **A:** Western blots of nuclear extracts (of cells treated with Tg for 6 h) or total cell lysates (cells were untreated). Bottom: quantitation of protein levels normalized to HSP90. \*, a non-specific band. **B:** Representative Western blot analysis of adiponectin complexes secreted by 3T3-L1 adipocytes following sucrose gradient fractionation (three repeats). Quantitation of triplicates from one experiment shown below. Bars represent mean  $\pm$  s.e.m. \* $p < 0.05$  by Student's *t* test.

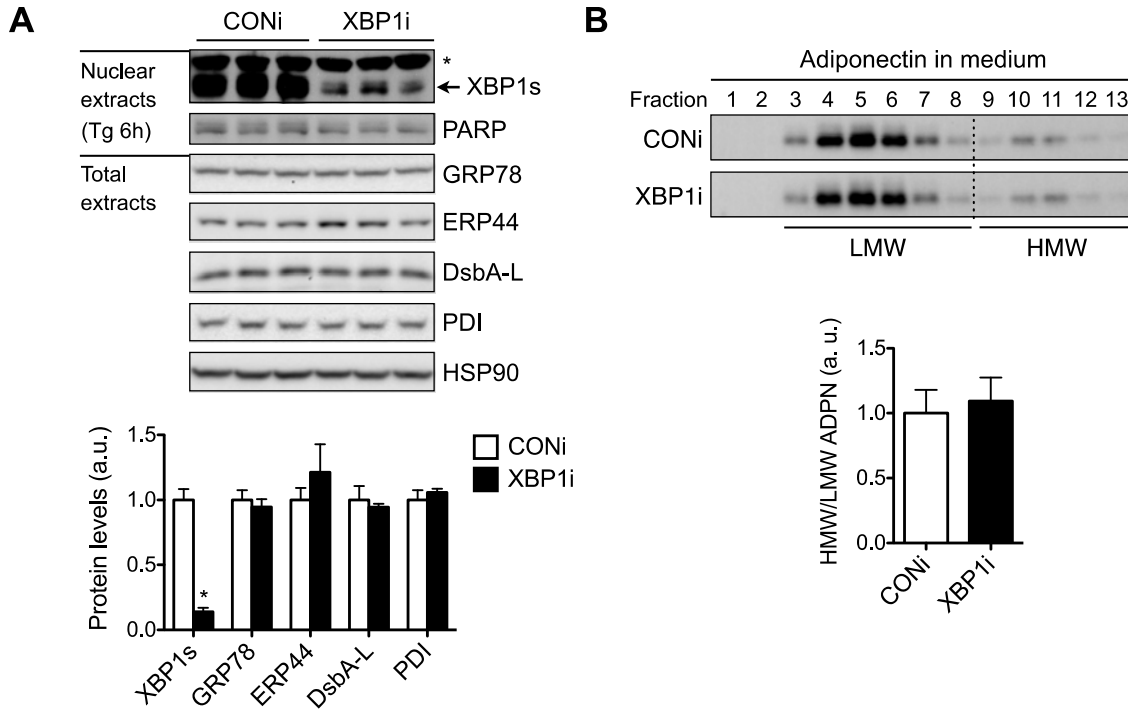

Supplement: supp_db13-1067_DB131067SupplementaryData.pdf [file supp_db13-1067_DB131067SupplementaryData.pdf]
